# Supplementary material for: Discovery of Tricyclic Pyranochromenone as Novel Bruton’s Tyrosine Kinase Inhibitors with In Vivo Antirheumatic Activity
Source: PubMed Central journal article supplement (PMC7663272; doi:10.3390/ijms21217919), 2020-10-25
Supplement: ijms-21-07919-s001.pdf [file ijms-21-07919-s001.pdf]

## Supplementary Materials

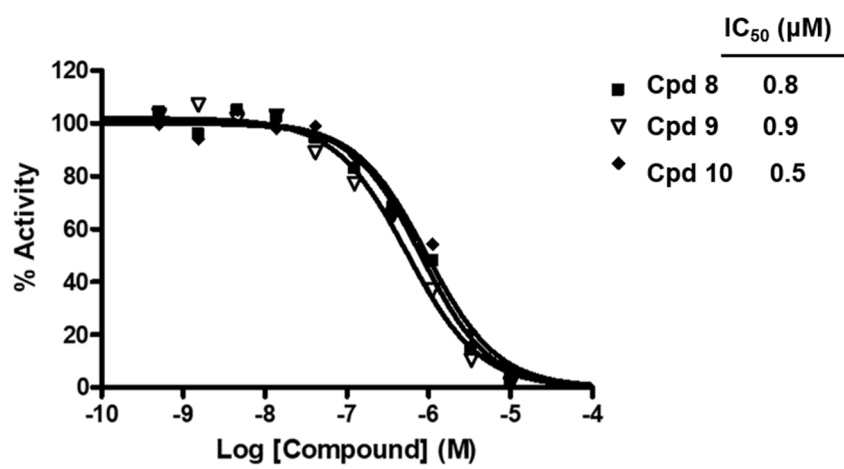

Figure S1. The concentration dependent  $IC_{50}$  curves of the compounds 8, 9 and 10
